# Supplementary material
Source: publisher figshare collection journal article supplement (https://acs.figshare.com/ndownloader/files/4683073)
Supplement: Supplementary file 1 [file 4683073]

data_global
_publ_contact_author              'Rogers, Robin D.'
_publ_contact_author_email        rdrogers@bama.ua.edu
_publ_author_address
;
Department of Chemistry
205 AIME
720 2nd Street
The University of Alabama
Tuscaloosa, AL 35487
USA
;
_publ_section_title                
;
Enantiomorphic Helical Coordination Polymers of
[M(pyrimidine)(OH2)4][SiF6]H2O (M = Co2+, Cu2+, Zn2+)
;
loop_
_publ_author_name                 
'Cordes, David B.'
'Sharma, C.V. Krishnamohan '
'Rogers, Robin D.' 
_journal_name_full                'Crystal Growth & Design'
_journal_volume                   ?
_journal_page_first               ?
_journal_page_last                ?
_journal_year                     ?
_audit_creation_method            SHELXL-97

  
  
data_kms63 
  
_audit_creation_method            SHELXL-97 
_chemical_name_systematic 
; 
 ? 
; 
_chemical_name_common             'Co-pyrimidine helix' 
_chemical_melting_point           ? 
_chemical_formula_moiety          'C4 H4 Co N2 O4, Si F6, O' 
_chemical_formula_sum 
 'C4 H4 Co F6 N2 O5 Si' 
_chemical_formula_weight          361.11 
  
loop_ 
 _atom_type_symbol 
 _atom_type_description 
 _atom_type_scat_dispersion_real 
 _atom_type_scat_dispersion_imag 
 _atom_type_scat_source 
 'C'  'C'   0.0033   0.0016 
 'International Tables Vol C Tables 4.2.6.8 and 6.1.1.4' 
 'H'  'H'   0.0000   0.0000 
 'International Tables Vol C Tables 4.2.6.8 and 6.1.1.4' 
 'N'  'N'   0.0061   0.0033 
 'International Tables Vol C Tables 4.2.6.8 and 6.1.1.4' 
 'F'  'F'   0.0171   0.0103 
 'International Tables Vol C Tables 4.2.6.8 and 6.1.1.4' 
 'O'  'O'   0.0106   0.0060 
 'International Tables Vol C Tables 4.2.6.8 and 6.1.1.4' 
 'Si'  'Si'   0.0817   0.0704 
 'International Tables Vol C Tables 4.2.6.8 and 6.1.1.4' 
 'Co'  'Co'   0.3494   0.9721 
 'International Tables Vol C Tables 4.2.6.8 and 6.1.1.4' 
  
_symmetry_cell_setting            Tetragonal 
_symmetry_space_group_name_H-M    'P 43 21 2' 
  
loop_ 
 _symmetry_equiv_pos_as_xyz 
 'x, y, z' 
 '-x, -y, z+1/2' 
 '-y+1/2, x+1/2, z+3/4' 
 'y+1/2, -x+1/2, z+1/4' 
 '-x+1/2, y+1/2, -z+3/4' 
 'x+1/2, -y+1/2, -z+1/4' 
 'y, x, -z' 
 '-y, -x, -z+1/2' 
  
_cell_length_a                    11.0983(7) 
_cell_length_b                    11.0983(7) 
_cell_length_c                    19.6865(19) 
_cell_angle_alpha                 90.00 
_cell_angle_beta                  90.00 
_cell_angle_gamma                 90.00 
_cell_volume                      2424.8(3) 
_cell_formula_units_Z             8 
_cell_measurement_temperature     173(2) 
_cell_measurement_reflns_used     2554 
_cell_measurement_theta_min       ? 
_cell_measurement_theta_max       ? 
  
_exptl_crystal_description        fragment 
_exptl_crystal_colour             yellow-orange 
_exptl_crystal_size_max           0.12 
_exptl_crystal_size_mid           0.10 
_exptl_crystal_size_min           0.08 
_exptl_crystal_density_meas       ? 
_exptl_crystal_density_diffrn     1.978 
_exptl_crystal_density_method     'not measured' 
_exptl_crystal_F_000              1416 
_exptl_absorpt_coefficient_mu     1.610 
_exptl_absorpt_correction_type    multi-scan 
_exptl_absorpt_correction_T_min   0.57567 
_exptl_absorpt_correction_T_max   0.87885 
_exptl_absorpt_process_details    '(SADABS; Sheldrick, 2002)' 
  
_exptl_special_details 
; 
 ? 
; 
  
_diffrn_ambient_temperature       173(2) 
_diffrn_radiation_wavelength      0.71073 
_diffrn_radiation_type            MoK\a 
_diffrn_radiation_source          'fine-focus sealed tube' 
_diffrn_radiation_monochromator   graphite 
_diffrn_measurement_device_type   'CCD area detector' 
_diffrn_measurement_method        '\w scans' 
_diffrn_detector_area_resol_mean  ? 
_diffrn_standards_number          ? 
_diffrn_standards_interval_count  ? 
_diffrn_standards_interval_time   ? 
_diffrn_standards_decay_%         ? 
_diffrn_reflns_number             10807 
_diffrn_reflns_av_R_equivalents   0.1337 
_diffrn_reflns_av_sigmaI/netI     0.0848 
_diffrn_reflns_limit_h_min        -12 
_diffrn_reflns_limit_h_max        9 
_diffrn_reflns_limit_k_min        -11 
_diffrn_reflns_limit_k_max        12 
_diffrn_reflns_limit_l_min        -21 
_diffrn_reflns_limit_l_max        21 
_diffrn_reflns_theta_min          2.11 
_diffrn_reflns_theta_max          23.33 
_reflns_number_total              1761 
_reflns_number_gt                 1335 
_reflns_threshold_expression      >2sigma(I) 
  
_computing_data_collection        'Siemens XSCANS' 
_computing_cell_refinement        'Siemens XSCANS' 
_computing_data_reduction         'Siemens SHELXTL' 
_computing_structure_solution     'SHELXS-97 (Sheldrick, 1990)' 
_computing_structure_refinement   'SHELXL-97 (Sheldrick, 1997)' 
_computing_molecular_graphics     'Siemens SHELXTL' 
_computing_publication_material   'Siemens SHELXTL' 
  
_refine_special_details 
; 
 Refinement of F^2^ against ALL reflections.  The weighted R-factor wR and 
 goodness of fit S are based on F^2^, conventional R-factors R are based 
 on F, with F set to zero for negative F^2^. The threshold expression of 
 F^2^ > 2sigma(F^2^) is used only for calculating R-factors(gt) etc. and is 
 not relevant to the choice of reflections for refinement.  R-factors based 
 on F^2^ are statistically about twice as large as those based on F, and R- 
 factors based on ALL data will be even larger. 
; 
  
_refine_ls_structure_factor_coef  Fsqd 
_refine_ls_matrix_type            full 
_refine_ls_weighting_scheme       calc 
_refine_ls_weighting_details 
 '0.1155, 12.1904' 
_atom_sites_solution_primary      direct 
_atom_sites_solution_secondary    difmap 
_atom_sites_solution_hydrogens    geom 
_refine_ls_hydrogen_treatment     constr
_refine_ls_extinction_method      SHELXL 
_refine_ls_extinction_coef        0.0086(19) 
_refine_ls_extinction_expression 
 'Fc^*^=kFc[1+0.001xFc^2^\l^3^/sin(2\q)]^-1/4^' 
_refine_ls_abs_structure_details 
 'Flack H D (1983), Acta Cryst. A39, 876-881' 
_refine_ls_abs_structure_Flack    0.07(8) 
_refine_ls_number_reflns          1761 
_refine_ls_number_parameters      192 
_refine_ls_number_restraints      30 
_refine_ls_R_factor_all           0.1107 
_refine_ls_R_factor_gt            0.0854 
_refine_ls_wR_factor_ref          0.2233 
_refine_ls_wR_factor_gt           0.2103 
_refine_ls_goodness_of_fit_ref    1.117 
_refine_ls_restrained_S_all       1.115 
_refine_ls_shift/su_max           0.000 
_refine_ls_shift/su_mean          0.000 
  
loop_ 
 _atom_site_label 
 _atom_site_type_symbol 
 _atom_site_fract_x 
 _atom_site_fract_y 
 _atom_site_fract_z 
 _atom_site_U_iso_or_equiv 
 _atom_site_adp_type 
 _atom_site_occupancy 
 _atom_site_symmetry_multiplicity 
 _atom_site_calc_flag 
 _atom_site_refinement_flags 
 _atom_site_disorder_assembly 
 _atom_site_disorder_group 
Co Co 0.65173(17) -0.84715(19) 0.00989(7) 0.0259(6) Uani 1 1 d . . . 
Si1 Si 0.7062(4) -0.2938(4) 0.0000 0.0457(19) Uani 1 2 d S . . 
O1 O 0.5354(9) -0.9940(9) -0.0026(4) 0.038(3) Uani 1 1 d . . . 
O2 O 0.7735(9) -0.7029(9) 0.0250(5) 0.043(3) Uani 1 1 d . . . 
O3 O 0.5375(9) -0.7767(10) 0.0823(4) 0.039(3) Uani 1 1 d . . . 
O4 O 0.7628(8) -0.9286(8) -0.0632(4) 0.023(2) Uani 1 1 d . . . 
N1 N 0.5582(11) -0.7463(10) -0.0659(5) 0.028(3) Uani 1 1 d . . . 
N2 N 0.4443(11) -0.7461(12) -0.1684(5) 0.032(3) Uani 1 1 d . . . 
C1 C 0.5568(12) -0.6264(13) -0.0652(6) 0.031(4) Uani 1 1 d U . . 
H1 H 0.5934 -0.5849 -0.0283 0.037 Uiso 1 1 calc R . . 
C2 C 0.5032(13) -0.5605(13) -0.1167(6) 0.028(3) Uani 1 1 d . . . 
H2 H 0.5052 -0.4749 -0.1175 0.034 Uiso 1 1 calc R . . 
C3 C 0.4463(13) -0.6271(13) -0.1673(6) 0.034(4) Uani 1 1 d . . . 
H3 H 0.4068 -0.5848 -0.2029 0.041 Uiso 1 1 calc R . . 
C4 C 0.4994(11) -0.8023(14) -0.1166(6) 0.026(3) Uani 1 1 d U . . 
H4 H 0.4965 -0.8879 -0.1156 0.032 Uiso 1 1 calc R . . 
Si2 Si 0.2020(4) -0.7980(4) 0.0000 0.0279(14) Uani 1 2 d S . . 
F4 F 0.1023(7) -0.7022(8) 0.0361(3) 0.041(2) Uani 1 1 d . A . 
F5 F 0.2943(18) -0.7819(18) 0.0700(8) 0.042(4) Uani 0.50 1 d PU A 1 
F6 F 0.1377(17) -0.9208(18) 0.0382(9) 0.043(5) Uani 0.50 1 d P A 1 
F5' F 0.3231(17) -0.7273(19) 0.0367(9) 0.053(5) Uani 0.50 1 d PU A 2 
F6' F 0.1808(19) -0.8875(18) 0.0651(9) 0.041(5) Uani 0.50 1 d PU A 2 
F1 F 0.7336(9) -0.1714(8) -0.0472(4) 0.055(3) Uani 1 1 d . . . 
F2 F 0.5832(10) -0.3222(10) -0.0473(4) 0.074(4) Uani 1 1 d . . . 
F3 F 0.7929(10) -0.3799(9) -0.0530(4) 0.064(3) Uani 1 1 d . . . 
O5 O 0.9295(10) -0.6693(11) -0.0794(5) 0.053(3) Uani 1 1 d . . . 
  
loop_ 
 _atom_site_aniso_label 
 _atom_site_aniso_U_11 
 _atom_site_aniso_U_22 
 _atom_site_aniso_U_33 
 _atom_site_aniso_U_23 
 _atom_site_aniso_U_13 
 _atom_site_aniso_U_12 
Co 0.0298(11) 0.0457(13) 0.0021(8) 0.0002(8) -0.0013(8) -0.0019(9) 
Si1 0.063(3) 0.063(3) 0.010(3) -0.011(2) 0.011(2) -0.036(4) 
O1 0.052(7) 0.049(7) 0.013(4) -0.006(4) 0.006(4) -0.018(5) 
O2 0.051(7) 0.037(6) 0.042(6) -0.002(5) -0.013(5) -0.013(5) 
O3 0.047(7) 0.063(8) 0.007(4) -0.011(5) 0.001(4) 0.006(6) 
O4 0.029(6) 0.036(6) 0.005(4) -0.003(4) 0.009(4) -0.001(4) 
N1 0.052(8) 0.019(7) 0.012(5) -0.010(5) -0.006(6) -0.006(5) 
N2 0.047(8) 0.045(9) 0.004(5) 0.000(5) 0.006(5) 0.003(6) 
C1 0.039(8) 0.045(10) 0.009(6) -0.010(6) -0.011(6) 0.003(6) 
C2 0.042(9) 0.030(8) 0.014(7) 0.008(6) 0.005(7) -0.011(7) 
C3 0.051(10) 0.035(11) 0.017(7) 0.001(7) 0.008(7) 0.007(7) 
C4 0.034(8) 0.034(8) 0.010(6) -0.002(6) 0.012(6) 0.018(7) 
Si2 0.038(2) 0.038(2) 0.008(3) -0.0041(16) 0.0041(16) 0.005(3) 
F4 0.039(5) 0.073(6) 0.012(4) -0.016(4) -0.001(4) 0.014(4) 
F5 0.052(8) 0.056(9) 0.017(7) -0.002(7) -0.008(7) 0.004(7) 
F6 0.040(13) 0.061(13) 0.029(10) -0.011(10) 0.012(9) -0.014(10) 
F5' 0.045(12) 0.089(15) 0.025(10) -0.005(11) -0.013(9) 0.015(11) 
F6' 0.056(10) 0.045(9) 0.023(8) 0.009(7) 0.022(7) 0.003(7) 
F1 0.083(7) 0.054(6) 0.029(4) 0.002(4) 0.024(5) -0.007(5) 
F2 0.106(8) 0.107(9) 0.008(4) -0.006(5) -0.013(5) -0.060(7) 
F3 0.105(8) 0.067(7) 0.020(4) -0.018(4) 0.023(5) -0.036(6) 
O5 0.052(7) 0.070(9) 0.036(6) 0.001(6) -0.006(5) -0.003(6) 
  
_geom_special_details 
; 
 All esds (except the esd in the dihedral angle between two l.s. planes) 
 are estimated using the full covariance matrix.  The cell esds are taken 
 into account individually in the estimation of esds in distances, angles 
 and torsion angles; correlations between esds in cell parameters are only 
 used when they are defined by crystal symmetry.  An approximate (isotropic) 
 treatment of cell esds is used for estimating esds involving l.s. planes. 
; 
  
loop_ 
 _geom_bond_atom_site_label_1 
 _geom_bond_atom_site_label_2 
 _geom_bond_distance 
 _geom_bond_site_symmetry_2 
 _geom_bond_publ_flag 
Co O3 2.062(9) . ? 
Co O1 2.094(9) . ? 
Co O4 2.099(8) . ? 
Co N2 2.107(11) 4_645 ? 
Co O2 2.116(9) . ? 
Co N1 2.134(11) . ? 
Si1 F1 1.673(9) . ? 
Si1 F1 1.673(9) 7_645 ? 
Si1 F2 1.682(10) . ? 
Si1 F2 1.682(10) 7_645 ? 
Si1 F3 1.711(9) 7_645 ? 
Si1 F3 1.712(9) . ? 
N1 C1 1.331(19) . ? 
N1 C4 1.345(17) . ? 
N2 C3 1.322(19) . ? 
N2 C4 1.343(17) . ? 
N2 Co 2.107(11) 3_434 ? 
C1 C2 1.386(18) . ? 
C2 C3 1.392(19) . ? 
Si2 F6' 1.638(17) . ? 
Si2 F6' 1.638(17) 7_645 ? 
Si2 F4 1.691(7) 7_645 ? 
Si2 F4 1.691(7) . ? 
Si2 F6 1.712(19) . ? 
Si2 F6 1.712(19) 7_645 ? 
Si2 F5' 1.72(2) . ? 
Si2 F5' 1.72(2) 7_645 ? 
Si2 F5 1.726(17) 7_645 ? 
Si2 F5 1.726(17) . ? 
F6 F6 1.76(4) 7_645 ? 
F5' F5' 1.65(3) 7_645 ? 
  
loop_ 
 _geom_angle_atom_site_label_1 
 _geom_angle_atom_site_label_2 
 _geom_angle_atom_site_label_3 
 _geom_angle 
 _geom_angle_site_symmetry_1 
 _geom_angle_site_symmetry_3 
 _geom_angle_publ_flag 
O3 Co O1 89.9(4) . . ? 
O3 Co O4 176.7(4) . . ? 
O1 Co O4 86.9(4) . . ? 
O3 Co N2 93.6(4) . 4_645 ? 
O1 Co N2 90.7(4) . 4_645 ? 
O4 Co N2 85.6(4) . 4_645 ? 
O3 Co O2 90.5(4) . . ? 
O1 Co O2 177.8(4) . . ? 
O4 Co O2 92.7(4) . . ? 
N2 Co O2 87.1(4) 4_645 . ? 
O3 Co N1 89.2(4) . . ? 
O1 Co N1 91.5(4) . . ? 
O4 Co N1 91.8(4) . . ? 
N2 Co N1 176.5(5) 4_645 . ? 
O2 Co N1 90.7(4) . . ? 
F1 Si1 F1 90.8(7) . 7_645 ? 
F1 Si1 F2 89.6(5) . . ? 
F1 Si1 F2 179.6(6) 7_645 . ? 
F1 Si1 F2 179.6(6) . 7_645 ? 
F1 Si1 F2 89.6(5) 7_645 7_645 ? 
F2 Si1 F2 90.1(7) . 7_645 ? 
F1 Si1 F3 89.1(5) . 7_645 ? 
F1 Si1 F3 90.7(4) 7_645 7_645 ? 
F2 Si1 F3 89.4(5) . 7_645 ? 
F2 Si1 F3 90.8(5) 7_645 7_645 ? 
F1 Si1 F3 90.7(4) . . ? 
F1 Si1 F3 89.1(5) 7_645 . ? 
F2 Si1 F3 90.8(5) . . ? 
F2 Si1 F3 89.4(5) 7_645 . ? 
F3 Si1 F3 179.7(8) 7_645 . ? 
C1 N1 C4 117.7(11) . . ? 
C1 N1 Co 121.5(8) . . ? 
C4 N1 Co 120.8(9) . . ? 
C3 N2 C4 116.4(12) . . ? 
C3 N2 Co 123.9(10) . 3_434 ? 
C4 N2 Co 119.5(11) . 3_434 ? 
N1 C1 C2 121.7(12) . . ? 
C1 C2 C3 116.1(13) . . ? 
N2 C3 C2 123.4(13) . . ? 
N2 C4 N1 124.8(14) . . ? 
F6' Si2 F6' 116.0(16) . 7_645 ? 
F6' Si2 F4 91.3(7) . 7_645 ? 
F6' Si2 F4 87.6(7) 7_645 7_645 ? 
F6' Si2 F4 87.6(7) . . ? 
F6' Si2 F4 91.3(7) 7_645 . ? 
F4 Si2 F4 177.9(7) 7_645 . ? 
F6' Si2 F6 27.7(7) . . ? 
F6' Si2 F6 88.6(12) 7_645 . ? 
F4 Si2 F6 85.7(7) 7_645 . ? 
F4 Si2 F6 92.5(7) . . ? 
F6' Si2 F6 88.6(12) . 7_645 ? 
F6' Si2 F6 27.7(7) 7_645 7_645 ? 
F4 Si2 F6 92.5(7) 7_645 7_645 ? 
F4 Si2 F6 85.7(7) . 7_645 ? 
F6 Si2 F6 61.9(13) . 7_645 ? 
F6' Si2 F5' 93.5(10) . . ? 
F6' Si2 F5' 150.4(11) 7_645 . ? 
F4 Si2 F5' 89.1(7) 7_645 . ? 
F4 Si2 F5' 92.8(7) . . ? 
F6 Si2 F5' 120.4(9) . . ? 
F6 Si2 F5' 177.3(10) 7_645 . ? 
F6' Si2 F5' 150.4(11) . 7_645 ? 
F6' Si2 F5' 93.5(10) 7_645 7_645 ? 
F4 Si2 F5' 92.8(7) 7_645 7_645 ? 
F4 Si2 F5' 89.1(7) . 7_645 ? 
F6 Si2 F5' 177.3(10) . 7_645 ? 
F6 Si2 F5' 120.4(9) 7_645 7_645 ? 
F5' Si2 F5' 57.3(14) . 7_645 ? 
F6' Si2 F5 177.4(12) . 7_645 ? 
F6' Si2 F5 61.5(10) 7_645 7_645 ? 
F4 Si2 F5 89.3(6) 7_645 7_645 ? 
F4 Si2 F5 91.8(7) . 7_645 ? 
F6 Si2 F5 150.0(10) . 7_645 ? 
F6 Si2 F5 88.8(9) 7_645 7_645 ? 
F5' Si2 F5 89.1(12) . 7_645 ? 
F5' Si2 F5 32.0(8) 7_645 7_645 ? 
F6' Si2 F5 61.5(10) . . ? 
F6' Si2 F5 177.4(12) 7_645 . ? 
F4 Si2 F5 91.8(7) 7_645 . ? 
F4 Si2 F5 89.3(6) . . ? 
F6 Si2 F5 88.8(9) . . ? 
F6 Si2 F5 150.0(10) 7_645 . ? 
F5' Si2 F5 32.0(8) . . ? 
F5' Si2 F5 89.1(12) 7_645 . ? 
F5 Si2 F5 121.0(15) 7_645 . ? 
Si2 F6 F6 59.1(7) . 7_645 ? 
F5' F5' Si2 61.3(7) 7_645 . ? 
  
loop_ 
 _geom_hbond_atom_site_label_D 
 _geom_hbond_atom_site_label_H 
 _geom_hbond_atom_site_label_A 
 _geom_hbond_distance_DH 
 _geom_hbond_distance_HA 
 _geom_hbond_distance_DA 
 _geom_hbond_angle_DHA 
 _geom_hbond_site_symmetry_A 
C2 H2 F2  0.95 2.35 3.107(17) 136.0 . 
C2 H2 F6  0.95 2.43 3.03(2) 121.2 3_444 
C3 H3 F6  0.95 2.48 3.08(2) 121.0 3_444 
C3 H3 F6  0.95 2.52 3.43(2) 159.5 5_554 
C2 H2 F6'  0.95 2.54 3.26(2) 132.6 3_444 
C1 H1 F2  0.95 2.56 3.481(16) 162.1 7_645 
  
_diffrn_measured_fraction_theta_max    0.998 
_diffrn_reflns_theta_full              23.33 
_diffrn_measured_fraction_theta_full   0.998 
_refine_diff_density_max    1.466 
_refine_diff_density_min   -0.711 
_refine_diff_density_rms    0.166 


#===END

  
data_kms64 
  
_audit_creation_method            SHELXL-97 
_chemical_name_systematic 
; 
 ? 
; 
_chemical_name_common             'Cu-pyrimidine helix' 
_chemical_melting_point           ? 
_chemical_formula_moiety          'C4 H12 Cu N2 O4, F6 Si, H2 O' 
_chemical_formula_sum 
 'C4 H14 Cu F6 N2 O5 Si' 
_chemical_formula_weight          375.80 
  
loop_ 
 _atom_type_symbol 
 _atom_type_description 
 _atom_type_scat_dispersion_real 
 _atom_type_scat_dispersion_imag 
 _atom_type_scat_source 
 'C'  'C'   0.0033   0.0016 
 'International Tables Vol C Tables 4.2.6.8 and 6.1.1.4' 
 'H'  'H'   0.0000   0.0000 
 'International Tables Vol C Tables 4.2.6.8 and 6.1.1.4' 
 'Si'  'Si'   0.0817   0.0704 
 'International Tables Vol C Tables 4.2.6.8 and 6.1.1.4' 
 'N'  'N'   0.0061   0.0033 
 'International Tables Vol C Tables 4.2.6.8 and 6.1.1.4' 
 'O'  'O'   0.0106   0.0060 
 'International Tables Vol C Tables 4.2.6.8 and 6.1.1.4' 
 'F'  'F'   0.0171   0.0103 
 'International Tables Vol C Tables 4.2.6.8 and 6.1.1.4' 
 'Cu'  'Cu'   0.3201   1.2651 
 'International Tables Vol C Tables 4.2.6.8 and 6.1.1.4' 
  
_symmetry_cell_setting            Tetragonal 
_symmetry_space_group_name_H-M    'P 41 21 2' 
  
loop_ 
 _symmetry_equiv_pos_as_xyz 
 'x, y, z' 
 '-x, -y, z+1/2' 
 '-y+1/2, x+1/2, z+1/4' 
 'y+1/2, -x+1/2, z+3/4' 
 '-x+1/2, y+1/2, -z+1/4' 
 'x+1/2, -y+1/2, -z+3/4' 
 'y, x, -z' 
 '-y, -x, -z+1/2' 
  
_cell_length_a                    11.1513(6) 
_cell_length_b                    11.1513(6) 
_cell_length_c                    19.3206(14) 
_cell_angle_alpha                 90.00 
_cell_angle_beta                  90.00 
_cell_angle_gamma                 90.00 
_cell_volume                      2402.5(3) 
_cell_formula_units_Z             8 
_cell_measurement_temperature     173(2) 
_cell_measurement_reflns_used     3492 
_cell_measurement_theta_min       ? 
_cell_measurement_theta_max       ? 
  
_exptl_crystal_description        fragment 
_exptl_crystal_colour             'pale blue' 
_exptl_crystal_size_max           0.40 
_exptl_crystal_size_mid           0.19 
_exptl_crystal_size_min           0.18 
_exptl_crystal_density_meas       ? 
_exptl_crystal_density_diffrn     2.078 
_exptl_crystal_density_method     'not measured' 
_exptl_crystal_F_000              1512 
_exptl_absorpt_coefficient_mu     2.016 
_exptl_absorpt_correction_type    multi-scan 
_exptl_absorpt_correction_T_min   0.40588 
_exptl_absorpt_correction_T_max   0.69496 
_exptl_absorpt_process_details    '(SADABS; Sheldrick, 2002)'
  
_exptl_special_details 
; 
 ? 
; 
  
_diffrn_ambient_temperature       173(2) 
_diffrn_radiation_wavelength      0.71073 
_diffrn_radiation_type            MoK\a 
_diffrn_radiation_source          'fine-focus sealed tube' 
_diffrn_radiation_monochromator   graphite 
_diffrn_measurement_device_type   'Siemens P4' 
_diffrn_measurement_method        '\w scans' 
_diffrn_detector_area_resol_mean  ? 
_diffrn_standards_number          ? 
_diffrn_standards_interval_count  ? 
_diffrn_standards_interval_time   ? 
_diffrn_standards_decay_%         ? 
_diffrn_reflns_number             10820 
_diffrn_reflns_av_R_equivalents   0.1013 
_diffrn_reflns_av_sigmaI/netI     0.0644 
_diffrn_reflns_limit_h_min        -12 
_diffrn_reflns_limit_h_max        12 
_diffrn_reflns_limit_k_min        -12 
_diffrn_reflns_limit_k_max        11 
_diffrn_reflns_limit_l_min        -21 
_diffrn_reflns_limit_l_max        20 
_diffrn_reflns_theta_min          2.11 
_diffrn_reflns_theta_max          23.24 
_reflns_number_total              1737 
_reflns_number_gt                 1331 
_reflns_threshold_expression      >2sigma(I) 
  
_computing_data_collection        'Siemens XSCANS' 
_computing_cell_refinement        'Siemens XSCANS' 
_computing_data_reduction         'Siemens SHELXTL' 
_computing_structure_solution     'SHELXS-97 (Sheldrick, 1990)' 
_computing_structure_refinement   'SHELXL-97 (Sheldrick, 1997)' 
_computing_molecular_graphics     'Siemens SHELXTL' 
_computing_publication_material   'Siemens SHELXTL' 
  
_refine_special_details 
; 
 Refinement of F^2^ against ALL reflections.  The weighted R-factor wR and 
 goodness of fit S are based on F^2^, conventional R-factors R are based 
 on F, with F set to zero for negative F^2^. The threshold expression of 
 F^2^ > 2sigma(F^2^) is used only for calculating R-factors(gt) etc. and is 
 not relevant to the choice of reflections for refinement.  R-factors based 
 on F^2^ are statistically about twice as large as those based on F, and R- 
 factors based on ALL data will be even larger. 
; 
  
_refine_ls_structure_factor_coef  Fsqd 
_refine_ls_matrix_type            fullcycle 
_refine_ls_weighting_scheme       calc 
_refine_ls_weighting_details 
 '0.0163' 
_atom_sites_solution_primary      direct 
_atom_sites_solution_secondary    difmap 
_atom_sites_solution_hydrogens    geom 
_refine_ls_hydrogen_treatment     constr
_refine_ls_extinction_method      SHELXL 
_refine_ls_extinction_coef        0.00017(17) 
_refine_ls_extinction_expression 
 'Fc^*^=kFc[1+0.001xFc^2^\l^3^/sin(2\q)]^-1/4^' 
_refine_ls_abs_structure_details 
 'Flack H D (1983), Acta Cryst. A39, 876-881' 
_refine_ls_abs_structure_Flack    -0.01(2) 
_refine_ls_number_reflns          1737 
_refine_ls_number_parameters      192 
_refine_ls_number_restraints      0 
_refine_ls_R_factor_all           0.0484 
_refine_ls_R_factor_gt            0.0295 
_refine_ls_wR_factor_ref          0.0561 
_refine_ls_wR_factor_gt           0.0521 
_refine_ls_goodness_of_fit_ref    0.927 
_refine_ls_restrained_S_all       0.927 
_refine_ls_shift/su_max           0.001 
_refine_ls_shift/su_mean          0.000 
  
loop_ 
 _atom_site_label 
 _atom_site_type_symbol 
 _atom_site_fract_x 
 _atom_site_fract_y 
 _atom_site_fract_z 
 _atom_site_U_iso_or_equiv 
 _atom_site_adp_type 
 _atom_site_occupancy 
 _atom_site_symmetry_multiplicity 
 _atom_site_calc_flag 
 _atom_site_refinement_flags 
 _atom_site_disorder_assembly 
 _atom_site_disorder_group 
Cu Cu 0.85553(6) 0.35436(6) 0.01241(2) 0.01616(16) Uani 1 1 d . . . 
Si1 Si 1.30205(13) 0.30205(13) 0.0000 0.0184(5) Uani 1 2 d S . . 
F1 F 1.1767(2) 0.2746(2) -0.04774(13) 0.0309(8) Uani 1 1 d . . . 
F2 F 1.3832(2) 0.2191(3) -0.05587(12) 0.0323(8) Uani 1 1 d . . . 
F3 F 1.3267(3) 0.4242(3) -0.04775(13) 0.0368(8) Uani 1 1 d . . . 
Si2 Si 0.80458(14) 0.80458(14) 0.0000 0.0209(5) Uani 1 2 d S . . 
F4 F 0.7069(3) 0.9023(2) 0.03526(12) 0.0330(8) Uani 1 1 d . A . 
F5 F 0.7960(6) 0.7147(6) 0.0706(3) 0.0355(17) Uani 0.50 1 d P A 1 
F5' F 0.7309(5) 0.6925(5) 0.0367(3) 0.0443(18) Uani 0.50 1 d P A 2 
F6 F 0.8868(6) 0.8208(6) 0.0719(3) 0.039(2) Uani 0.50 1 d P A 1 
F6' F 0.9243(6) 0.8705(6) 0.0345(3) 0.0357(18) Uani 0.50 1 d P A 2 
N1 N 0.9456(3) 0.2617(4) 0.08482(18) 0.0143(10) Uani 1 1 d . . . 
N2 N 1.0622(3) 0.2617(4) 0.18849(18) 0.0142(10) Uani 1 1 d . . . 
O1 O 0.7044(3) 0.2328(3) 0.03249(15) 0.0324(10) Uani 1 1 d . . . 
H1B H 0.7109 0.2038 0.0706 0.039 Uiso 1 1 d R . . 
H1A H 0.6879 0.1820 0.0039 0.039 Uiso 1 1 d R . . 
O2 O 1.0109(3) 0.4758(3) -0.00586(13) 0.0302(9) Uani 1 1 d . . . 
H2A H 1.0595 0.4332 0.0024 0.036 Uiso 1 1 d R . . 
H2B H 1.0184 0.5501 0.0150 0.036 Uiso 1 1 d R . . 
O3 O 0.7864(3) 0.4729(3) 0.08243(15) 0.0351(11) Uani 1 1 d . . . 
H3B H 0.7830 0.5606 0.0716 0.042 Uiso 1 1 d R . . 
H3A H 0.7773 0.4608 0.1201 0.042 Uiso 1 1 d R . . 
O4 O 0.9354(3) 0.2397(3) -0.05973(15) 0.0227(9) Uani 1 1 d . . . 
H4A H 0.9219 0.2293 -0.1002 0.027 Uiso 1 1 d R . . 
H4B H 1.0265 0.2439 -0.0528 0.027 Uiso 1 1 d R . . 
O5 O 0.6741(3) 0.0795(3) -0.07596(16) 0.0400(11) Uani 1 1 d . . . 
H5A H 0.7105 0.0068 -0.0774 0.048 Uiso 1 1 d R . . 
H5B H 0.6728 0.0992 -0.1143 0.048 Uiso 1 1 d R . . 
C1 C 0.9467(4) 0.1416(5) 0.0855(2) 0.0196(12) Uani 1 1 d . . . 
H1 H 0.9077 0.1000 0.0490 0.023 Uiso 1 1 calc R . . 
C2 C 1.0016(4) 0.0761(4) 0.1365(2) 0.0170(11) Uani 1 1 d . . . 
H2 H 1.0011 -0.0091 0.1363 0.020 Uiso 1 1 calc R . . 
C3 C 1.0573(4) 0.1405(5) 0.1880(2) 0.0195(11) Uani 1 1 d . . . 
H3 H 1.0941 0.0980 0.2250 0.023 Uiso 1 1 calc R . . 
C4 C 1.0041(4) 0.3173(4) 0.1369(2) 0.0140(11) Uani 1 1 d . . . 
H4 H 1.0041 0.4025 0.1370 0.017 Uiso 1 1 calc R . . 
  
loop_ 
 _atom_site_aniso_label 
 _atom_site_aniso_U_11 
 _atom_site_aniso_U_22 
 _atom_site_aniso_U_33 
 _atom_site_aniso_U_23 
 _atom_site_aniso_U_13 
 _atom_site_aniso_U_12 
Cu 0.0213(4) 0.0182(4) 0.0090(2) 0.0009(3) -0.0009(3) 0.0005(3) 
Si1 0.0210(8) 0.0210(8) 0.0133(11) -0.0031(6) 0.0031(6) -0.0012(10) 
F1 0.0252(19) 0.041(2) 0.0262(16) -0.0041(14) -0.0064(13) -0.0039(15) 
F2 0.034(2) 0.045(2) 0.0179(14) -0.0042(14) 0.0076(13) 0.0106(15) 
F3 0.050(2) 0.034(2) 0.0266(15) 0.0090(15) 0.0048(15) -0.0096(16) 
Si2 0.0239(8) 0.0239(8) 0.0149(11) -0.0016(7) 0.0016(7) 0.0009(10) 
F4 0.044(2) 0.036(2) 0.0188(14) -0.0002(14) 0.0061(15) 0.0103(14) 
F5 0.041(5) 0.050(5) 0.016(3) 0.004(4) 0.010(3) 0.009(4) 
F5' 0.063(5) 0.035(4) 0.035(4) 0.014(3) 0.021(3) -0.002(3) 
F6 0.043(5) 0.052(6) 0.023(4) -0.026(4) -0.017(4) 0.026(4) 
F6' 0.036(5) 0.030(5) 0.041(4) -0.008(4) -0.002(3) -0.007(3) 
N1 0.021(3) 0.012(3) 0.010(2) -0.0057(19) 0.0037(19) -0.0021(19) 
N2 0.017(3) 0.016(3) 0.010(2) 0.0042(19) 0.0015(19) 0.0010(19) 
O1 0.042(3) 0.032(2) 0.0232(19) 0.0075(17) -0.0032(17) -0.0002(18) 
O2 0.034(2) 0.023(2) 0.034(2) -0.0045(17) -0.0023(18) 0.0052(16) 
O3 0.059(3) 0.033(2) 0.013(2) 0.0129(18) 0.0081(18) 0.012(2) 
O4 0.021(2) 0.035(2) 0.0123(18) 0.0006(16) -0.0037(16) -0.0009(17) 
O5 0.049(3) 0.046(3) 0.0252(19) 0.0125(18) 0.0098(19) 0.013(2) 
C1 0.023(3) 0.024(4) 0.012(2) 0.000(3) 0.002(2) 0.000(3) 
C2 0.016(3) 0.018(3) 0.017(2) 0.006(3) 0.000(2) -0.001(3) 
C3 0.022(3) 0.019(3) 0.017(3) 0.005(3) 0.003(2) 0.000(3) 
C4 0.013(3) 0.010(3) 0.019(3) -0.001(2) 0.005(2) -0.002(2) 
  
_geom_special_details 
; 
 All esds (except the esd in the dihedral angle between two l.s. planes) 
 are estimated using the full covariance matrix.  The cell esds are taken 
 into account individually in the estimation of esds in distances, angles 
 and torsion angles; correlations between esds in cell parameters are only 
 used when they are defined by crystal symmetry.  An approximate (isotropic) 
 treatment of cell esds is used for estimating esds involving l.s. planes. 
; 
  
loop_ 
 _geom_bond_atom_site_label_1 
 _geom_bond_atom_site_label_2 
 _geom_bond_distance 
 _geom_bond_site_symmetry_2 
 _geom_bond_publ_flag 
Cu N2 2.000(4) 4_564 ? 
Cu N1 2.009(4) . ? 
Cu O3 2.043(3) . ? 
Cu O4 2.091(3) . ? 
Cu O1 2.197(3) . ? 
Cu O2 2.227(4) . ? 
Si1 F3 1.668(3) 7_645 ? 
Si1 F3 1.668(3) . ? 
Si1 F2 1.685(2) 7_645 ? 
Si1 F2 1.685(2) . ? 
Si1 F1 1.702(3) 7_645 ? 
Si1 F1 1.702(3) . ? 
Si2 F5' 1.655(7) . ? 
Si2 F5' 1.655(7) 7 ? 
Si2 F6' 1.663(7) 7 ? 
Si2 F6' 1.663(7) . ? 
Si2 F6 1.675(6) . ? 
Si2 F6 1.675(6) 7 ? 
Si2 F4 1.685(3) . ? 
Si2 F4 1.685(3) 7 ? 
Si2 F5 1.696(6) . ? 
Si2 F5 1.696(6) 7 ? 
F5 F6 1.558(9) . ? 
F5' F5' 1.541(13) 7 ? 
F6' F6' 1.580(14) 7 ? 
N1 C1 1.338(6) . ? 
N1 C4 1.350(5) . ? 
N2 C4 1.341(5) . ? 
N2 C3 1.352(6) . ? 
N2 Cu 2.000(4) 3_645 ? 
C1 C2 1.371(6) . ? 
C2 C3 1.376(6) . ? 
  
loop_ 
 _geom_angle_atom_site_label_1 
 _geom_angle_atom_site_label_2 
 _geom_angle_atom_site_label_3 
 _geom_angle 
 _geom_angle_site_symmetry_1 
 _geom_angle_site_symmetry_3 
 _geom_angle_publ_flag 
N2 Cu N1 176.72(16) 4_564 . ? 
N2 Cu O3 88.52(14) 4_564 . ? 
N1 Cu O3 93.47(12) . . ? 
N2 Cu O4 91.81(12) 4_564 . ? 
N1 Cu O4 86.35(13) . . ? 
O3 Cu O4 176.54(15) . . ? 
N2 Cu O1 90.68(14) 4_564 . ? 
N1 Cu O1 86.72(14) . . ? 
O3 Cu O1 89.60(14) . . ? 
O4 Cu O1 93.85(12) . . ? 
N2 Cu O2 90.62(14) 4_564 . ? 
N1 Cu O2 91.98(14) . . ? 
O3 Cu O2 90.28(13) . . ? 
O4 Cu O2 86.27(12) . . ? 
O1 Cu O2 178.69(11) . . ? 
F3 Si1 F3 92.1(2) 7_645 . ? 
F3 Si1 F2 90.33(14) 7_645 7_645 ? 
F3 Si1 F2 90.36(14) . 7_645 ? 
F3 Si1 F2 90.36(14) 7_645 . ? 
F3 Si1 F2 90.33(14) . . ? 
F2 Si1 F2 179.0(2) 7_645 . ? 
F3 Si1 F1 89.01(14) 7_645 7_645 ? 
F3 Si1 F1 178.89(18) . 7_645 ? 
F2 Si1 F1 89.70(14) 7_645 7_645 ? 
F2 Si1 F1 89.59(14) . 7_645 ? 
F3 Si1 F1 178.89(18) 7_645 . ? 
F3 Si1 F1 89.01(14) . . ? 
F2 Si1 F1 89.59(14) 7_645 . ? 
F2 Si1 F1 89.70(14) . . ? 
F1 Si1 F1 89.9(2) 7_645 . ? 
F5' Si2 F5' 55.5(5) . 7 ? 
F5' Si2 F6' 175.6(3) . 7 ? 
F5' Si2 F6' 124.1(3) 7 7 ? 
F5' Si2 F6' 124.1(3) . . ? 
F5' Si2 F6' 175.6(3) 7 . ? 
F6' Si2 F6' 56.7(5) 7 . ? 
F5' Si2 F6 89.9(3) . . ? 
F5' Si2 F6 145.3(4) 7 . ? 
F6' Si2 F6 90.2(5) 7 . ? 
F6' Si2 F6 34.9(2) . . ? 
F5' Si2 F6 145.3(4) . 7 ? 
F5' Si2 F6 89.9(3) 7 7 ? 
F6' Si2 F6 34.9(2) 7 7 ? 
F6' Si2 F6 90.2(5) . 7 ? 
F6 Si2 F6 124.8(6) . 7 ? 
F5' Si2 F4 89.7(3) . . ? 
F5' Si2 F4 90.3(3) 7 . ? 
F6' Si2 F4 85.9(3) 7 . ? 
F6' Si2 F4 94.0(3) . . ? 
F6 Si2 F4 87.0(2) . . ? 
F6 Si2 F4 92.9(2) 7 . ? 
F5' Si2 F4 90.3(3) . 7 ? 
F5' Si2 F4 89.7(3) 7 7 ? 
F6' Si2 F4 94.0(3) 7 7 ? 
F6' Si2 F4 85.9(3) . 7 ? 
F6 Si2 F4 92.9(2) . 7 ? 
F6 Si2 F4 87.0(2) 7 7 ? 
F4 Si2 F4 180.0(3) . 7 ? 
F5' Si2 F5 35.0(3) . . ? 
F5' Si2 F5 90.5(4) 7 . ? 
F6' Si2 F5 145.3(3) 7 . ? 
F6' Si2 F5 89.1(3) . . ? 
F6 Si2 F5 55.0(3) . . ? 
F6 Si2 F5 175.9(3) 7 . ? 
F4 Si2 F5 91.2(2) . . ? 
F4 Si2 F5 88.9(2) 7 . ? 
F5' Si2 F5 90.5(4) . 7 ? 
F5' Si2 F5 35.0(3) 7 7 ? 
F6' Si2 F5 89.1(3) 7 7 ? 
F6' Si2 F5 145.3(3) . 7 ? 
F6 Si2 F5 175.9(3) . 7 ? 
F6 Si2 F5 55.0(3) 7 7 ? 
F4 Si2 F5 88.9(2) . 7 ? 
F4 Si2 F5 91.2(2) 7 7 ? 
F5 Si2 F5 125.5(5) . 7 ? 
F6 F5 Si2 61.8(3) . . ? 
F5' F5' Si2 62.2(3) 7 . ? 
F5 F6 Si2 63.2(3) . . ? 
F6' F6' Si2 61.6(2) 7 . ? 
C1 N1 C4 116.6(4) . . ? 
C1 N1 Cu 121.8(3) . . ? 
C4 N1 Cu 121.6(3) . . ? 
C4 N2 C3 116.0(4) . . ? 
C4 N2 Cu 120.9(3) . 3_645 ? 
C3 N2 Cu 123.1(3) . 3_645 ? 
N1 C1 C2 123.0(4) . . ? 
C1 C2 C3 116.3(5) . . ? 
N2 C3 C2 123.0(4) . . ? 
N2 C4 N1 125.1(4) . . ? 
  
loop_ 
 _geom_hbond_atom_site_label_D 
 _geom_hbond_atom_site_label_H 
 _geom_hbond_atom_site_label_A 
 _geom_hbond_distance_DH 
 _geom_hbond_distance_HA 
 _geom_hbond_distance_DA 
 _geom_hbond_angle_DHA 
 _geom_hbond_site_symmetry_A 
O1 H1A O5  0.81 1.93 2.725(5) 167.7 . 
O1 H1B F5  0.81 2.11 2.845(7) 152.1 5_645 
C2 H2 F3  0.95 2.38 3.167(5) 139.9 3_635 
C2 H2 F6'  0.95 2.53 3.143(8) 122.4 1_545 
O2 H2A F1  0.74 2.40 3.019(4) 141.9 . 
O2 H2A F2  0.74 2.13 2.807(4) 152.3 7_645 
O2 H2B O5  0.92 1.94 2.823(5) 159.2 7_655 
O2 H2B F4  0.92 2.38 2.903(4) 115.4 7 
C3 H3 F3  0.95 2.55 3.462(6) 160.5 5_745 
O3 H3A F4  0.75 1.95 2.676(4) 164.2 5_645 
O3 H3B F5'  1.00 1.72 2.676(7) 158.6 . 
O3 H3B F5  1.00 1.72 2.708(8) 166.6 . 
O4 H4A F2  0.81 1.95 2.701(4) 154.5 6_454 
O4 H4B F1  1.03 1.71 2.729(4) 170.2 . 
O5 H5A F6  0.91 1.82 2.702(7) 163.3 7_545 
O5 H5A F5  0.91 2.36 3.196(8) 154.0 7_545 
O5 H5A F4  0.91 2.47 2.942(4) 112.7 1_545 
O5 H5A F6'  0.91 2.17 2.905(8) 137.3 7_545 
O5 H5B F3  0.77 2.43 2.975(4) 128.8 6_454 
O5 H5B F1  0.77 2.21 2.933(4) 156.8 6_454 
  
_diffrn_measured_fraction_theta_max    0.999 
_diffrn_reflns_theta_full              23.24 
_diffrn_measured_fraction_theta_full   0.999 
_refine_diff_density_max    0.302 
_refine_diff_density_min   -0.282 
_refine_diff_density_rms    0.059 

#===END

  
data_kms48 
  
_audit_creation_method            SHELXL-97 
_chemical_name_systematic 
; 
 ? 
; 
_chemical_name_common             'Zn-pyrimidine helix' 
_chemical_melting_point           ? 
_chemical_formula_moiety          'C4 H12 N2 O4 Zn, F6 Si, H2 O' 
_chemical_formula_sum 
 'C4 H14 F6 N2 O5 Si Zn' 
_chemical_formula_weight          377.63 
  
loop_ 
 _atom_type_symbol 
 _atom_type_description 
 _atom_type_scat_dispersion_real 
 _atom_type_scat_dispersion_imag 
 _atom_type_scat_source 
 'C'  'C'   0.0033   0.0016 
 'International Tables Vol C Tables 4.2.6.8 and 6.1.1.4' 
 'H'  'H'   0.0000   0.0000 
 'International Tables Vol C Tables 4.2.6.8 and 6.1.1.4' 
 'Si'  'Si'   0.0817   0.0704 
 'International Tables Vol C Tables 4.2.6.8 and 6.1.1.4' 
 'N'  'N'   0.0061   0.0033 
 'International Tables Vol C Tables 4.2.6.8 and 6.1.1.4' 
 'O'  'O'   0.0106   0.0060 
 'International Tables Vol C Tables 4.2.6.8 and 6.1.1.4' 
 'F'  'F'   0.0171   0.0103 
 'International Tables Vol C Tables 4.2.6.8 and 6.1.1.4' 
 'Zn'  'Zn'   0.2839   1.4301 
 'International Tables Vol C Tables 4.2.6.8 and 6.1.1.4' 
  
_symmetry_cell_setting            Tetragonal 
_symmetry_space_group_name_H-M    'P 41 21 2' 
  
loop_ 
 _symmetry_equiv_pos_as_xyz 
 'x, y, z' 
 '-x, -y, z+1/2' 
 '-y+1/2, x+1/2, z+1/4' 
 'y+1/2, -x+1/2, z+3/4' 
 '-x+1/2, y+1/2, -z+1/4' 
 'x+1/2, -y+1/2, -z+3/4' 
 'y, x, -z' 
 '-y, -x, -z+1/2' 
  
_cell_length_a                    11.1860(2) 
_cell_length_b                    11.1860(2) 
_cell_length_c                    19.7088(4) 
_cell_angle_alpha                 90.00 
_cell_angle_beta                  90.00 
_cell_angle_gamma                 90.00 
_cell_volume                      2466.09(8) 
_cell_formula_units_Z             8 
_cell_measurement_temperature     173(2) 
_cell_measurement_reflns_used     5523 
_cell_measurement_theta_min       ? 
_cell_measurement_theta_max       ? 
  
_exptl_crystal_description        parallepiped 
_exptl_crystal_colour             colorless 
_exptl_crystal_size_max           0.26 
_exptl_crystal_size_mid           0.24 
_exptl_crystal_size_min           0.12 
_exptl_crystal_density_meas       ? 
_exptl_crystal_density_diffrn     2.034 
_exptl_crystal_density_method     'not measured' 
_exptl_crystal_F_000              1520 
_exptl_absorpt_coefficient_mu     2.185 
_exptl_absorpt_correction_type    multi-scan 
_exptl_absorpt_correction_T_min   0.597129 
_exptl_absorpt_correction_T_max   0.76959857 
_exptl_absorpt_process_details    '(SADABS; Sheldrick, 2002)' 
  
_exptl_special_details 
; 
 ? 
; 
  
_diffrn_ambient_temperature       173(2) 
_diffrn_radiation_wavelength      0.71073 
_diffrn_radiation_type            MoK\a 
_diffrn_radiation_source          'fine-focus sealed tube' 
_diffrn_radiation_monochromator   graphite 
_diffrn_measurement_device_type   'Siemens P4' 
_diffrn_measurement_method        '\w scans' 
_diffrn_detector_area_resol_mean  ? 
_diffrn_standards_number          ? 
_diffrn_standards_interval_count  ? 
_diffrn_standards_interval_time   ? 
_diffrn_standards_decay_%         ? 
_diffrn_reflns_number             15405 
_diffrn_reflns_av_R_equivalents   0.2363 
_diffrn_reflns_av_sigmaI/netI     0.1783 
_diffrn_reflns_limit_h_min        -13 
_diffrn_reflns_limit_h_max        14 
_diffrn_reflns_limit_k_min        -10 
_diffrn_reflns_limit_k_max        14 
_diffrn_reflns_limit_l_min        -20 
_diffrn_reflns_limit_l_max        25 
_diffrn_reflns_theta_min          2.09 
_diffrn_reflns_theta_max          28.15 
_reflns_number_total              2916 
_reflns_number_gt                 1652 
_reflns_threshold_expression      >2sigma(I) 
  
_computing_data_collection        'Siemens XSCANS' 
_computing_cell_refinement        'Siemens XSCANS' 
_computing_data_reduction         'Siemens SHELXTL' 
_computing_structure_solution     'SHELXS-97 (Sheldrick, 1990)' 
_computing_structure_refinement   'SHELXL-97 (Sheldrick, 1997)' 
_computing_molecular_graphics     'Siemens SHELXTL' 
_computing_publication_material   'Siemens SHELXTL' 
  
_refine_special_details 
; 
 Refinement of F^2^ against ALL reflections.  The weighted R-factor wR and 
 goodness of fit S are based on F^2^, conventional R-factors R are based 
 on F, with F set to zero for negative F^2^. The threshold expression of 
 F^2^ > 2sigma(F^2^) is used only for calculating R-factors(gt) etc. and is 
 not relevant to the choice of reflections for refinement.  R-factors based 
 on F^2^ are statistically about twice as large as those based on F, and R- 
 factors based on ALL data will be even larger. 
; 
  
_refine_ls_structure_factor_coef  Fsqd 
_refine_ls_matrix_type            full 
_refine_ls_weighting_scheme       calc 
_refine_ls_weighting_details 
 '0.0000, 0.0000' 
_atom_sites_solution_primary      direct 
_atom_sites_solution_secondary    difmap 
_atom_sites_solution_hydrogens    geom 
_refine_ls_hydrogen_treatment     constr
_refine_ls_extinction_method      SHELXL 
_refine_ls_extinction_coef        0.0039(3) 
_refine_ls_extinction_expression 
 'Fc^*^=kFc[1+0.001xFc^2^\l^3^/sin(2\q)]^-1/4^' 
_refine_ls_abs_structure_details 
 'Flack H D (1983), Acta Cryst. A39, 876-881' 
_refine_ls_abs_structure_Flack    0.008(19) 
_refine_ls_number_reflns          2916 
_refine_ls_number_parameters      192 
_refine_ls_number_restraints      0 
_refine_ls_R_factor_all           0.0900 
_refine_ls_R_factor_gt            0.0482 
_refine_ls_wR_factor_ref          0.0853 
_refine_ls_wR_factor_gt           0.0755 
_refine_ls_goodness_of_fit_ref    0.650 
_refine_ls_restrained_S_all       0.650 
_refine_ls_shift/su_max           0.001 
_refine_ls_shift/su_mean          0.000 
  
loop_ 
 _atom_site_label 
 _atom_site_type_symbol 
 _atom_site_fract_x 
 _atom_site_fract_y 
 _atom_site_fract_z 
 _atom_site_U_iso_or_equiv 
 _atom_site_adp_type 
 _atom_site_occupancy 
 _atom_site_symmetry_multiplicity 
 _atom_site_calc_flag 
 _atom_site_refinement_flags 
 _atom_site_disorder_assembly 
 _atom_site_disorder_group 
Zn Zn 0.84917(5) 0.35133(5) 0.01216(2) 0.02711(15) Uani 1 1 d . . . 
N1 N 0.9472(3) 0.2494(4) 0.08503(16) 0.0264(9) Uani 1 1 d . . . 
N2 N 1.0602(3) 0.2467(4) 0.18641(16) 0.0252(9) Uani 1 1 d . . . 
O1 O 0.7034(3) 0.2335(3) 0.02950(14) 0.0487(10) Uani 1 1 d . . . 
H1B H 0.7099 0.2046 0.0676 0.058 Uiso 1 1 d R . . 
H1A H 0.6869 0.1828 0.0009 0.058 Uiso 1 1 d R . . 
O2 O 0.9983(3) 0.4679(3) -0.00321(12) 0.0380(9) Uani 1 1 d . . . 
H2A H 1.0470 0.4252 0.0050 0.046 Uiso 1 1 d R . . 
H2B H 1.0059 0.5421 0.0177 0.046 Uiso 1 1 d R . . 
O3 O 0.7823(4) 0.4688(3) 0.08362(14) 0.0528(12) Uani 1 1 d . . . 
H3B H 0.7789 0.5564 0.0728 0.063 Uiso 1 1 d R . . 
H3A H 0.7732 0.4566 0.1213 0.063 Uiso 1 1 d R . . 
O4 O 0.9291(3) 0.2380(3) -0.06175(13) 0.0342(9) Uani 1 1 d . . . 
H4A H 0.9156 0.2277 -0.1023 0.041 Uiso 1 1 d R . . 
H4B H 1.0202 0.2423 -0.0548 0.041 Uiso 1 1 d R . . 
O5 O 0.6695(3) 0.0791(3) -0.07585(15) 0.0536(11) Uani 1 1 d . . . 
H5A H 0.7059 0.0064 -0.0773 0.064 Uiso 1 1 d R . . 
H5B H 0.6682 0.0988 -0.1142 0.064 Uiso 1 1 d R . . 
C1 C 0.9472(4) 0.1314(4) 0.0844(2) 0.0294(11) Uani 1 1 d . . . 
H1 H 0.9084 0.0910 0.0481 0.035 Uiso 1 1 calc R . . 
C2 C 1.0019(4) 0.0644(5) 0.1347(2) 0.0340(12) Uani 1 1 d . . . 
H2 H 1.0006 -0.0205 0.1346 0.041 Uiso 1 1 calc R . . 
C3 C 1.0584(4) 0.1290(4) 0.1853(2) 0.0315(12) Uani 1 1 d . . . 
H3 H 1.0977 0.0867 0.2207 0.038 Uiso 1 1 calc R . . 
C4 C 1.0044(4) 0.3041(5) 0.1358(2) 0.0278(11) Uani 1 1 d . . . 
H4 H 1.0056 0.3890 0.1360 0.033 Uiso 1 1 calc R . . 
Si2 Si 0.80006(13) -0.19994(13) 0.0000 0.0288(5) Uani 1 2 d S . . 
F4 F 0.7031(3) -0.1015(2) 0.03471(12) 0.0453(8) Uani 1 1 d . A . 
F5 F 0.7907(7) -0.2883(7) 0.0699(3) 0.0522(18) Uani 0.50 1 d P A 1 
F6 F 0.9208(7) -0.1363(7) 0.0352(4) 0.056(2) Uani 0.50 1 d P A 1 
F5' F 0.7292(7) -0.3143(6) 0.0353(3) 0.058(2) Uani 0.50 1 d P A 2 
F6' F 0.8812(7) -0.1840(8) 0.0700(3) 0.062(3) Uani 0.50 1 d P A 2 
Si1 Si 1.20357(12) -0.20357(12) 0.2500 0.0286(5) Uani 1 2 d S . . 
F1 F 1.2309(3) -0.3268(3) 0.20280(13) 0.0544(9) Uani 1 1 d . . . 
F2 F 1.2869(3) -0.1214(3) 0.19571(12) 0.0540(9) Uani 1 1 d . . . 
F3 F 1.0829(3) -0.1791(3) 0.20338(12) 0.0577(10) Uani 1 1 d . . . 
  
loop_ 
 _atom_site_aniso_label 
 _atom_site_aniso_U_11 
 _atom_site_aniso_U_22 
 _atom_site_aniso_U_33 
 _atom_site_aniso_U_23 
 _atom_site_aniso_U_13 
 _atom_site_aniso_U_12 
Zn 0.0337(4) 0.0278(3) 0.0199(2) 0.0026(2) -0.0013(2) 0.0029(3) 
N1 0.037(3) 0.024(2) 0.018(2) -0.0031(17) -0.0038(18) 0.0027(18) 
N2 0.033(3) 0.025(2) 0.018(2) 0.0004(17) -0.0028(18) -0.0011(17) 
O1 0.057(3) 0.048(2) 0.0408(19) 0.0163(17) 0.0000(17) -0.0090(19) 
O2 0.040(2) 0.028(2) 0.0460(19) -0.0004(15) -0.0035(16) -0.0019(16) 
O3 0.098(4) 0.037(2) 0.023(2) 0.0062(17) 0.0119(19) 0.029(2) 
O4 0.031(2) 0.047(2) 0.0250(17) -0.0095(16) -0.0036(15) 0.0069(17) 
O5 0.059(3) 0.055(3) 0.047(2) 0.0100(19) 0.010(2) 0.000(2) 
C1 0.037(3) 0.025(3) 0.026(2) -0.005(2) -0.001(2) 0.000(2) 
C2 0.045(3) 0.026(3) 0.031(3) 0.003(2) -0.001(2) -0.006(3) 
C3 0.037(3) 0.029(3) 0.029(2) 0.006(2) -0.003(2) 0.004(2) 
C4 0.038(3) 0.023(3) 0.023(3) -0.001(2) -0.003(2) 0.000(2) 
Si2 0.0309(7) 0.0309(7) 0.0244(10) -0.0038(6) 0.0038(6) 0.0020(9) 
F4 0.057(2) 0.048(2) 0.0307(13) -0.0002(13) 0.0141(15) 0.0179(15) 
F5 0.068(6) 0.050(5) 0.039(4) 0.012(4) 0.016(4) 0.008(4) 
F6 0.049(5) 0.049(6) 0.068(5) -0.026(4) -0.002(4) -0.010(4) 
F5' 0.075(6) 0.032(4) 0.066(5) 0.020(4) 0.023(4) 0.001(4) 
F6' 0.058(6) 0.092(8) 0.037(5) -0.034(4) -0.028(4) 0.031(5) 
Si1 0.0331(7) 0.0331(7) 0.0198(10) 0.0044(6) 0.0044(6) 0.0051(9) 
F1 0.074(2) 0.040(2) 0.0490(17) -0.0101(15) 0.0120(16) 0.0076(17) 
F2 0.073(2) 0.057(2) 0.0319(15) 0.0078(14) 0.0162(15) -0.0155(18) 
F3 0.057(2) 0.077(3) 0.0391(16) 0.0077(17) -0.0153(16) 0.0187(19) 
  
_geom_special_details 
; 
 All esds (except the esd in the dihedral angle between two l.s. planes) 
 are estimated using the full covariance matrix.  The cell esds are taken 
 into account individually in the estimation of esds in distances, angles 
 and torsion angles; correlations between esds in cell parameters are only 
 used when they are defined by crystal symmetry.  An approximate (isotropic) 
 treatment of cell esds is used for estimating esds involving l.s. planes. 
; 
  
loop_ 
 _geom_bond_atom_site_label_1 
 _geom_bond_atom_site_label_2 
 _geom_bond_distance 
 _geom_bond_site_symmetry_2 
 _geom_bond_publ_flag 
Zn O3 2.066(3) . ? 
Zn O1 2.125(3) . ? 
Zn N2 2.127(3) 4_564 ? 
Zn O4 2.128(3) . ? 
Zn N1 2.137(3) . ? 
Zn O2 2.139(3) . ? 
N1 C1 1.319(6) . ? 
N1 C4 1.336(5) . ? 
N2 C3 1.316(6) . ? 
N2 C4 1.341(5) . ? 
N2 Zn 2.127(3) 3_645 ? 
C1 C2 1.386(6) . ? 
C2 C3 1.384(6) . ? 
Si2 F5' 1.658(7) . ? 
Si2 F5' 1.658(7) 7_645 ? 
Si2 F6' 1.661(6) . ? 
Si2 F6' 1.661(6) 7_645 ? 
Si2 F6 1.677(8) . ? 
Si2 F6 1.677(8) 7_645 ? 
Si2 F4 1.690(3) . ? 
Si2 F4 1.690(3) 7_645 ? 
Si2 F5 1.699(6) . ? 
Si2 F5 1.699(6) 7_645 ? 
F6 F6 1.655(16) 7_645 ? 
F5' F5' 1.552(13) 7_645 ? 
Si1 F3 1.655(3) 8_665 ? 
Si1 F3 1.655(3) . ? 
Si1 F2 1.691(2) . ? 
Si1 F2 1.691(2) 8_665 ? 
Si1 F1 1.691(3) 8_665 ? 
Si1 F1 1.691(3) . ? 
  
loop_ 
 _geom_angle_atom_site_label_1 
 _geom_angle_atom_site_label_2 
 _geom_angle_atom_site_label_3 
 _geom_angle 
 _geom_angle_site_symmetry_1 
 _geom_angle_site_symmetry_3 
 _geom_angle_publ_flag 
O3 Zn O1 90.39(15) . . ? 
O3 Zn N2 89.28(14) . 4_564 ? 
O1 Zn N2 89.31(14) . 4_564 ? 
O3 Zn O4 175.94(16) . . ? 
O1 Zn O4 93.63(13) . . ? 
N2 Zn O4 91.34(11) 4_564 . ? 
O3 Zn N1 93.84(12) . . ? 
O1 Zn N1 87.40(14) . . ? 
N2 Zn N1 175.47(16) 4_564 . ? 
O4 Zn N1 85.78(12) . . ? 
O3 Zn O2 89.52(14) . . ? 
O1 Zn O2 178.54(11) . . ? 
N2 Zn O2 92.15(14) 4_564 . ? 
O4 Zn O2 86.45(12) . . ? 
N1 Zn O2 91.15(13) . . ? 
C1 N1 C4 117.8(4) . . ? 
C1 N1 Zn 121.8(3) . . ? 
C4 N1 Zn 120.3(3) . . ? 
C3 N2 C4 117.3(4) . . ? 
C3 N2 Zn 123.9(3) . 3_645 ? 
C4 N2 Zn 118.8(3) . 3_645 ? 
N1 C1 C2 122.3(4) . . ? 
C3 C2 C1 115.8(5) . . ? 
N2 C3 C2 122.8(4) . . ? 
N1 C4 N2 124.1(4) . . ? 
F5' Si2 F5' 55.8(5) . 7_645 ? 
F5' Si2 F6' 89.7(4) . . ? 
F5' Si2 F6' 145.2(5) 7_645 . ? 
F5' Si2 F6' 145.2(5) . 7_645 ? 
F5' Si2 F6' 89.7(4) 7_645 7_645 ? 
F6' Si2 F6' 124.9(7) . 7_645 ? 
F5' Si2 F6 122.6(4) . . ? 
F5' Si2 F6 176.3(4) 7_645 . ? 
F6' Si2 F6 34.0(3) . . ? 
F6' Si2 F6 91.4(5) 7_645 . ? 
F5' Si2 F6 176.3(4) . 7_645 ? 
F5' Si2 F6 122.6(4) 7_645 7_645 ? 
F6' Si2 F6 91.4(5) . 7_645 ? 
F6' Si2 F6 34.0(3) 7_645 7_645 ? 
F6 Si2 F6 59.2(6) . 7_645 ? 
F5' Si2 F4 91.5(3) . . ? 
F5' Si2 F4 89.2(3) 7_645 . ? 
F6' Si2 F4 86.8(3) . . ? 
F6' Si2 F4 92.8(3) 7_645 . ? 
F6 Si2 F4 94.2(3) . . ? 
F6 Si2 F4 85.1(3) 7_645 . ? 
F5' Si2 F4 89.2(3) . 7_645 ? 
F5' Si2 F4 91.5(3) 7_645 7_645 ? 
F6' Si2 F4 92.8(3) . 7_645 ? 
F6' Si2 F4 86.8(3) 7_645 7_645 ? 
F6 Si2 F4 85.1(3) . 7_645 ? 
F6 Si2 F4 94.2(3) 7_645 7_645 ? 
F4 Si2 F4 179.2(3) . 7_645 ? 
F5' Si2 F5 35.0(3) . . ? 
F5' Si2 F5 90.8(5) 7_645 . ? 
F6' Si2 F5 54.7(4) . . ? 
F6' Si2 F5 176.5(4) 7_645 . ? 
F6 Si2 F5 87.8(4) . . ? 
F6 Si2 F5 146.1(4) 7_645 . ? 
F4 Si2 F5 90.6(2) . . ? 
F4 Si2 F5 89.7(2) 7_645 . ? 
F5' Si2 F5 90.8(5) . 7_645 ? 
F5' Si2 F5 35.0(3) 7_645 7_645 ? 
F6' Si2 F5 176.5(4) . 7_645 ? 
F6' Si2 F5 54.7(4) 7_645 7_645 ? 
F6 Si2 F5 146.1(4) . 7_645 ? 
F6 Si2 F5 87.8(4) 7_645 7_645 ? 
F4 Si2 F5 89.7(2) . 7_645 ? 
F4 Si2 F5 90.6(2) 7_645 7_645 ? 
F5 Si2 F5 125.9(6) . 7_645 ? 
F6 F6 Si2 60.4(3) 7_645 . ? 
F5' F5' Si2 62.1(3) 7_645 . ? 
F3 Si1 F3 92.2(2) 8_665 . ? 
F3 Si1 F2 89.93(15) 8_665 . ? 
F3 Si1 F2 90.48(15) . . ? 
F3 Si1 F2 90.48(15) 8_665 8_665 ? 
F3 Si1 F2 89.93(15) . 8_665 ? 
F2 Si1 F2 179.4(3) . 8_665 ? 
F3 Si1 F1 88.67(15) 8_665 8_665 ? 
F3 Si1 F1 179.06(19) . 8_665 ? 
F2 Si1 F1 89.83(15) . 8_665 ? 
F2 Si1 F1 89.76(15) 8_665 8_665 ? 
F3 Si1 F1 179.06(19) 8_665 . ? 
F3 Si1 F1 88.66(15) . . ? 
F2 Si1 F1 89.76(15) . . ? 
F2 Si1 F1 89.83(15) 8_665 . ? 
F1 Si1 F1 90.5(2) 8_665 . ? 
  
loop_ 
 _geom_hbond_atom_site_label_D 
 _geom_hbond_atom_site_label_H 
 _geom_hbond_atom_site_label_A 
 _geom_hbond_distance_DH 
 _geom_hbond_distance_HA 
 _geom_hbond_distance_DA 
 _geom_hbond_angle_DHA 
 _geom_hbond_site_symmetry_A 
C1 H1 F6  0.95 2.56 3.162(9) 121.5 . 
C1 H1 F6  0.95 2.56 3.461(9) 157.5 7_645 
O1 H1A O5  0.82 1.92 2.727(5) 169.6 . 
O1 H1B F5  0.82 2.22 2.979(7) 154.1 5_655 
C2 H2 F3  0.95 2.42 3.174(6) 136.6 . 
C2 H2 F6  0.95 2.51 3.117(9) 121.6 . 
O2 H2A F2  0.74 2.16 2.838(4) 152.2 5_755 
O2 H2A F1  0.74 2.47 3.085(4) 141.5 4_664 
O2 H2B O5  0.93 2.00 2.886(4) 157.6 7_655 
O2 H2B F4  0.93 2.40 2.926(4) 115.7 7_655 
O3 H3A F4  0.76 1.98 2.716(4) 162.2 5_655 
O3 H3B F5'  1.00 1.72 2.674(7) 157.9 1_565 
O3 H3B F5  1.00 1.74 2.732(8) 167.7 1_565 
O4 H4A F2  0.82 2.00 2.755(4) 152.5 7_645 
O4 H4B F1  1.03 1.74 2.767(4) 172.3 4_664 
O5 H5A F6  0.91 2.17 2.915(9) 138.2 7_645 
O5 H5A F4  0.91 2.52 2.995(4) 113.3 . 
O5 H5A F5  0.91 2.42 3.263(9) 154.3 7_645 
O5 H5A F6'  0.91 1.87 2.757(9) 164.1 7_645 
O5 H5B F3  0.79 2.46 3.031(4) 130.8 7_645 
O5 H5B F1  0.79 2.29 3.024(4) 155.9 7_645 
  
_diffrn_measured_fraction_theta_max    0.971 
_diffrn_reflns_theta_full              25.30 
_diffrn_measured_fraction_theta_full   0.999 
_refine_diff_density_max    0.512 
_refine_diff_density_min   -1.606 
_refine_diff_density_rms    0.187 

#===END
